# THE AMERICAN JOURNAL OF PSYCHIATRY

---

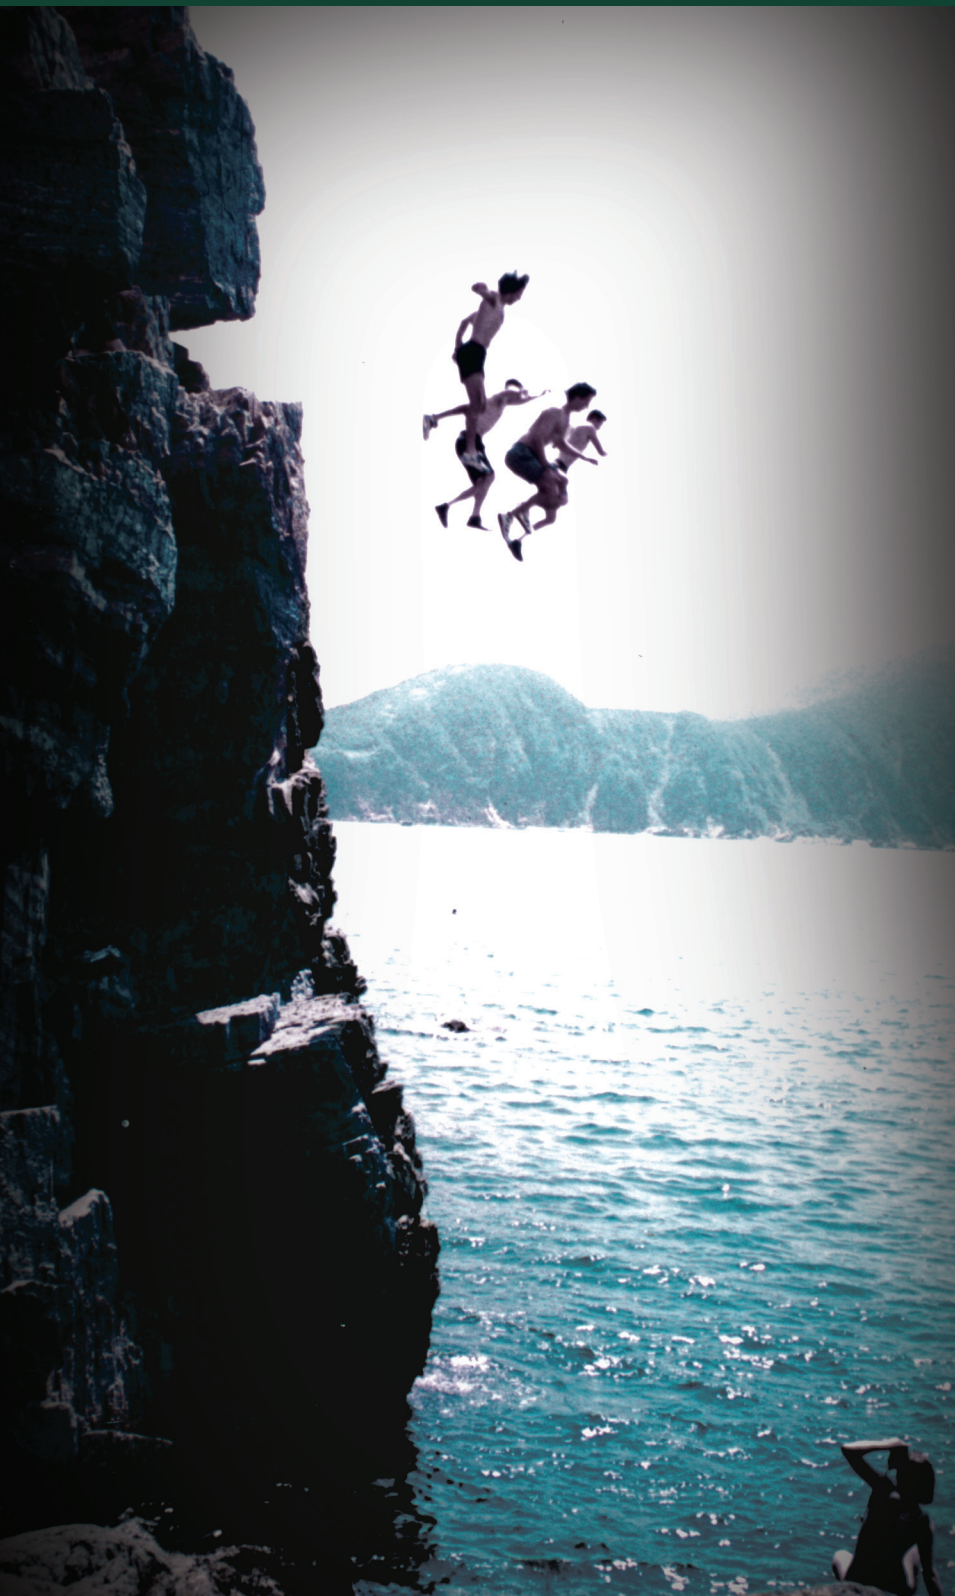

**Behavioral Health Insurance Parity: Does Oregon's Experience Presage the National Experience With the Mental Health Parity and Addiction Equity Act?**

K. John McConnell, Ph.D., et al. 31

◀ **Risk Taking and the Adolescent Reward System: A Potential Common Link to Substance Abuse**  
Sophia Schneider et al. 39

**Adolescent Irritability: Phenotypic Associations and Genetic Links With Depressed Mood**

Argyris Stringaris, M.D., Ph.D., et al. 47

**Risk of Mortality Among Individual Antipsychotics in Patients With Dementia**

Helen C. Kales, M.D., et al. 71

**Continuing Medical Education** 105

**January 2012**

**Volume 169 • Number 1**

---

Official Journal of the  
AMERICAN PSYCHIATRIC ASSOCIATION

---

[ajp.psychiatryonline.org](http://ajp.psychiatryonline.org)
