# THE AMERICAN JOURNAL OF PSYCHIATRY

## EDITOR-IN-CHIEF

Robert Freedman, M.D.

## DEPUTY EDITORS

David A. Lewis, M.D.

Robert Michels, M.D.

Daniel S. Pine, M.D.

Susan K. Schultz, M.D.

Carol A. Tamminga, M.D.

## EDITORIAL STAFF

**Executive Editor**  
Michael D. Roy

**Senior Editor/Features Writer**  
Jane Weaver, E.L.S.

**Senior Editor**  
John J. Guardiano, Ph.D.

**Production Manager**  
Susan Westrate

**Assistant Editors**  
Katie Duffy  
Angela Moore

**Editorial Support Services  
Manager**  
Nicole Gray

**Editorial Assistant**  
Linda LaCour

**Administrative Assistant**  
Heidi Koch

**Assistants to the Editors**  
Lois Lilienthal  
Laura English  
Rachel Hogg  
Russell A. Scholl

## ASSOCIATE EDITORS

Kathleen T. Brady, M.D., Ph.D.

David A. Brent, M.D.

Linda Brzustowicz, M.D.

Cameron S. Carter, M.D.

Steven Hamilton, M.D., Ph.D.

Daniel C. Javitt, M.D.

Bankole Johnson, M.D.

Ellen Leibenluft, M.D.

Douglas F. Levinson, M.D.

Jeffrey A. Lieberman, M.D.

Barbara Milrod, M.D.

Maria A. Oquendo, M.D.

Jerrold F. Rosenbaum, M.D.

A. John Rush, M.D.

Larry J. Siever, M.D.

Patricia Suppes, M.D., Ph.D.

## EDITOR EMERITA

Nancy C. Andreasen, M.D., Ph.D.

## FORMER EDITORS

Amariah Brigham, M.D.  
1844-1849

T. Romeyn Beck, M.D.  
1849-1854

John P. Gray, M.D.  
1854-1886

G. Alder Blumer, M.D.  
1886-1894

Richard Dewey, M.D.  
1894-1897

Henry M. Hurd, M.D.  
1897-1904

Edward N. Brush, M.D.  
1904-1931

Clarence B. Farrar, M.D.  
1931-1965

Francis J. Braceland, M.D.  
1965-1978

John C. Nemiah, M.D.  
1978-1993

The American Journal of Psychiatry is online at [ajp.psychiatryonline.org](http://ajp.psychiatryonline.org)

# THE AMERICAN PSYCHIATRIC ASSOCIATION

1000 Wilson Blvd., Suite 1825, Arlington, VA 22209-3901  
(888) 357-7924 (toll-free inside the U.S. and Canada) / (703) 907-7300  
web site: [www.psych.org/](http://www.psych.org/) e-mail: [apa@psych.org](mailto:apa@psych.org)

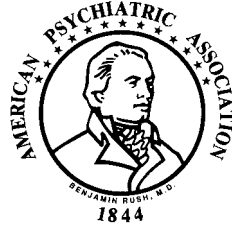

## OFFICERS 2011-2012

|                 |                      |
|-----------------|----------------------|
| President       | John M. Oldham, M.D. |
| President-Elect | Dilip V. Jeste, M.D. |
| Treasurer       | David Fassler, M.D.  |
| Secretary       | Roger Peele, M.D.    |

## ASSEMBLY

|               |                          |
|---------------|--------------------------|
| Speaker       | Ann Marie Sullivan, M.D. |
| Speaker-Elect | R. Scott Benson, M.D.    |
| Recorder      | Melinda Young, M.D.      |

## MEDICAL DIRECTOR'S OFFICE

|                          |                            |
|--------------------------|----------------------------|
| Medical Director and CEO | James H. Scully, Jr., M.D. |
|--------------------------|----------------------------|

## BOARD OF TRUSTEES

|                            |                                  |
|----------------------------|----------------------------------|
| Carol A. Bernstein, M.D.   | Alan F. Schatzberg, M.D.         |
| Brian Crowley, M.D.        | Joyce A. Spurgeon, M.D.          |
| Marc David Graff, M.D.     | Frederick J. Stoddard, Jr., M.D. |
| James A. Greene, M.D.      | Nada L. Stotland, M.D., M.P.H.   |
| Marilyn Griffin, M.D.      | John J. Wernert III, M.D.        |
| Sarah Johnson, M.D., M.Sc. | Alik S. Widge, M.D., Ph.D.       |
| James E. Nininger, M.D.    | William M. Womack, M.D.          |

## PUBLISHER

Rebecca D. Rinehart

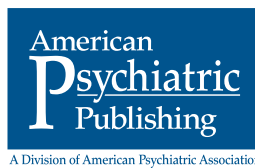

The American Journal of Psychiatry is online at [ajp.psychiatryonline.org](http://ajp.psychiatryonline.org)

THE AMERICAN PSYCHIATRIC ASSOCIATION  
Chairpersons of Councils, Commissions, Committees, and Task Forces

**Standing Committees**

---

**Bylaws**

John O. Gaston, M.D.

**Elections**

Robert E. Kelly, Jr., M.D.

**Ethics**

Richard D. Milone, M.D.

**Finance and Budget**

Frank W. Brown, M.D.

**Audit**

David Fassler, M.D.

**Investment Oversight**

Larry R. Faulkner, M.D.

**Joint Reference**

Dilip V. Jeste, M.D.

**Membership**

Joseph Ezra V. Rubin, M.D.

**Nominating**

Carol A. Bernstein, M.D.

**Tellers**

Eliot Sorel, M.D.

**Council on Addiction Psychiatry**

---

John A. Renner, M.D.

**Council on Advocacy and  
Government Relations**

---

Robert Paul Cabaj, M.D.

*Advocacy and Litigation Funding*

Jeffrey L. Metzner, M.D.

**Council on Children, Adolescents,  
and Their Families**

---

Steven Paul Cuffe, M.D.

*Agnes Purcell McGavin Award*

John E. Schowalter, M.D.

*Blanche F. Ittleson Research Award*

Beth Ann Brooks, M.D.

**Council on Communications**

---

Jeffrey A. Borenstein, M.D.

**Council on Healthcare Systems  
and Financing**

---

Anita Smith Everett, M.D.

*Reimbursement for Psychiatric Care*

Joseph T. English, M.D.

*RBRVS, Codes and Reimbursement*

Ronald M. Burd, M.D.

**Council on Medical Education and  
Lifelong Learning**

---

Sandra Sexson, M.D.

*APA Public Psychiatry Fellowship Selection  
Committee*

Jules M. Ranz, M.D.

*APA/SAMHSA Minority Fellowship Selection and  
Advisory*

Maria A. Oquendo, M.D.

*Scientific Program*

Kenneth R. Silk, M.D.

*Task Force to Update the Ethics Annotations*

Laura W. Roberts, M.D.

*Vestermark Award Committee*

Kailie R. Shaw, M.D.

**Council on Minority Health and  
Health Disparities**

---

Sandra C. Walker, M.D.

**Council on Psychiatry And Law**

---

Patricia R. Recupero, M.D., J.D.

*Isaac Ray Award*

Paul S. Appelbaum, M.D.

*Judicial Action*

Paul S. Appelbaum, M.D.

*Manfred S. Guttmacher Award*

Marilyn Price, M.D., C.M.

**Council on Psychosomatic  
Medicine and Geriatric Psychiatry**

---

Robert Paul Roca, M.D.

**Council on Research and Quality  
Care**

---

Jeffrey A. Lieberman, M.D.

*Electronic Health Records*

Steven Roy Daviss, M.D.

*Psychiatric Dimensions of Disasters*

Robert J. Ursano, M.D.

*Research Awards*

Stuart C. Yudofsky, M.D.

*Steering Committee on Practice Guidelines*

Joel Yager, M.D.

*Task Force on DSM-V*

David J. Kupfer, M.D.

*Task Force on Gender Identity Disorder*

William M. Byne, M.D.
