# The American Journal of PSYCHIATRY

Latest  
IMPACT  
FACTOR  
12.759!

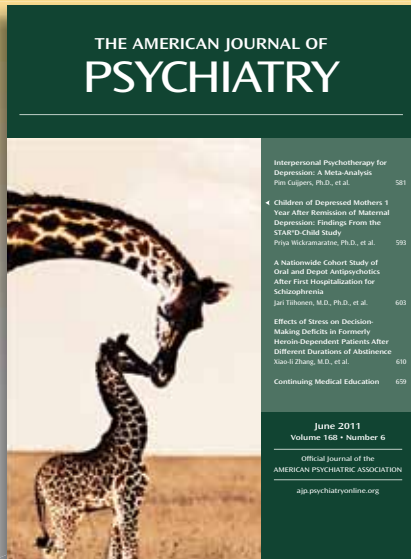

## Official Journal of the American Psychiatric Association

Edited by Robert Freedman, M.D.

- The *American Journal of Psychiatry* has an impact factor of 12.759, a rise from last year's 12.522 and 2-point rise from the previous year's 10.545, according to the recently released 2010 Journal Citation Reports® (Thomson Reuters, 2011), placing it 2nd among the 126 journals in psychiatry journals indexed, while still remaining the far-and-away leader in total citations.
- *The American Journal of Psychiatry* (AJP) is also the #2 journal in psychiatry in terms of immediacy according to Thomson Scientific's Immediacy Index. This important performance metric

is calculated by dividing the number of citations to articles published in a given year by the number of articles published in that year.

- The Immediacy Index is a good measure of how quickly a given journal's articles are cited—AJP's #2 placement is a result of publishing articles that are relevant, covering current “hot” topics and cutting-edge research, and getting these findings to the field faster with AJP in Advance, the Journal's online-ahead-of-print publication protocol.
- A recent poll conducted by the BioMedical & Life Sciences Division of The Special Libraries Association identified the 100 most influential journals in all of Biology & Medicine over the last 100 years. *The American Journal of Psychiatry* was among those honored, the only psychiatry/psychology journal represented.

No other psychiatric journal reaches more psychiatrists with greater impact or immediacy than the journal that the overwhelming majority of psychiatrists considers essential: AJP.

ISSN 0002-953X      [ajp.psychiatryonline.org](http://ajp.psychiatryonline.org)

To order a subscription, visit [www.appi.org](http://www.appi.org).

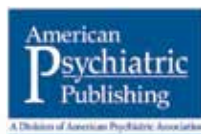

The First and Last Word in Psychiatry

[www.appi.org](http://www.appi.org) • 1-800-368-5777 • 703-907-7322

Find us on [facebook](https://www.facebook.com/ajp) and [twitter](https://twitter.com/ajp)      Priority Code AH1132

# The Residents' JOURNAL

The Residents' JOURNAL  
a publication of  
The American Journal of Psychiatry

November 2011      Volume 6      Issue 11

**Inside**

- In This Issue**
- Resident Physicians and DSM-5**  
Sarah M. Fayad, M.D.
- Overview of the Genetics of Autism Spectrum Disorders**  
Arshya Vahabzadeh, M.D.,  
Tua Lang, B.A.
- The Role of Oxytocin in the Treatment of Autism Spectrum Disorders**  
Justine Wittencouer, M.D.
- Improving the Health Care Setting for Individuals With Autism Spectrum Disorders**  
Jonathan Gursky, Robert  
Accordino, M.D., M.Sc.
- Autism Spectrum Disorders in Hispanic Communities: Socio-Cultural and Health Care Barriers to Diagnosis and Treatment**  
Ryan Whitney Dobbs, B.S.
- Book Review**  
Arshya Vahabzadeh, M.D.
- Test Your Knowledge**
- Residents' Journal Info**

*In This Issue*



This issue of the *Residents' Journal* focuses on autism spectrum disorders. The issue begins with an article by Dr. Arshya Vahabzadeh (Guest Section Editor) and Tua Lang, who present an overview of the genetics of autism spectrum disorders. Next, Dr. Justine Wittencouer discusses the use of oxytocin in the treatment of these disorders. Then, Jonathan Gursky and Dr. Robert Accordino offer valuable information with regard to improving the health care setting for patients with autism. Ryan Whitney Dobbs focuses his discussion on the issues surrounding the diagnosis of autism in Hispanic communities. The issue concludes with a book review by Dr. Arshya Vahabzadeh of *Autism Spectrum Disorders in Infants and Toddlers*. Autism spectrum disorders are common neurodevelopmental disorders, and we hope that the articles presented in this issue provide the physician-in-training with useful information regarding their etiology, genetic basis, diagnosis, and treatment as well as how to make the health care setting more comfortable for patients with these disorders.

**Editor-in-Chief**  
Sarah M. Fayad, M.D.  
**Section Editor**  
Joseph M. Caronella, M.D.  
**Associate Editor**  
Martha Sewall, M.D.

**Editor Emerit**  
Sarah B. Johnson, M.D.  
Molly McVey, M.D.  
**Guest Section Editor**  
Arshya Vahabzadeh, M.D.  
**Staff Editor**  
Angela Moore

The Residents' Journal accepts manuscripts authored by medical students, resident physicians, and fellows. To submit your paper, please visit the manuscript submission site at [mc.manuscriptcentral.com/appi-ajp](http://mc.manuscriptcentral.com/appi-ajp) and either create an account or use your existing account. For manuscript type, select "Residents." Then follow the instructions to upload your manuscript. Residents who are interested in participating as Guest Section Editors should e-mail the Residents' Journal Editor-in-Chief Sarah M. Fayad at [fayad@ufl.edu](mailto:fayad@ufl.edu).

See the September 2010 issue for details on the new peer review process.

The Residents' Journal is sent free-of-charge to all psychiatry residents. Anyone interested in being included on the distribution list should contact Angela Moore, the Residents' Journal staff editor at [ajp@psych.org](mailto:ajp@psych.org) with "Subscribe to Residents' Journal" in the subject line.

To access the complete Residents' Journal archives, visit [ajp.psychiatryonline.org/misc/Residents\\_Journal.dtl](http://ajp.psychiatryonline.org/misc/Residents_Journal.dtl)

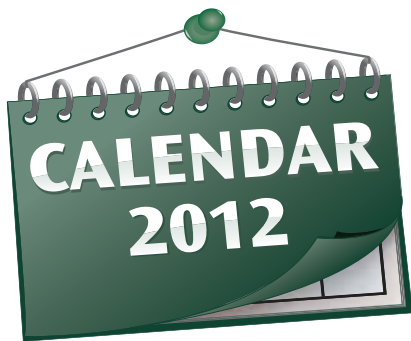

For free listing of your organization's official annual or regional meeting, please send us the following information: sponsor, location, inclusive dates, type and number of continuing education credits (if available), and the name, address, and telephone number of the person or group to contact for more information. In order for an event to appear in our listing, all notices and changes must be received at least 6 months in advance of the meeting and should be addressed to:

**Calendar, American Journal of Psychiatry, 1000 Wilson Boulevard, Suite 1825, Arlington, VA 22209-3901, [swestate@psych.org](mailto:swestate@psych.org) (e-mail).**

*Because of space limitations, only listings of meetings of the greatest interest to Journal readers may be included.*

---

## MARCH

**March 21–24**, 23rd Annual Meeting, American Neuropsychiatric Association, New Orleans, La. Contact: (614) 447-2077 or visit [www.anpaonline.org](http://www.anpaonline.org) (web site).

---

## APRIL

**April 22–25**, Annual Meeting of the North American Society for Psychosocial Obstetrics and Gynecology (NASPOG), Providence, R.I. Contact NASPOG National Office, 8213 Lakenheath Way, Potomac, MD 20854; (301) 983-6282 (tel); [info@naspog.org](mailto:info@naspog.org) (email); [www.naspog.org](http://www.naspog.org) (web site).

---

## MAY

**May 3–5**, 56th Annual Meeting, American Academy of Psychoanalysis and Dynamic Psychiatry, Philadelphia, Pa. Contact: Executive Office, AAPDP, PO Box 30, Bloomfield, CT 06002; (888) 691-8281

(tel), (860) 286-0787 (fax), [info@aapdp.org](mailto:info@aapdp.org) (tel), (860) 286-0787 (fax), [info@aapdp.org](mailto:info@aapdp.org) (e-mail), [www.aapdp.org](http://www.aapdp.org) (web site).

**May 5–9**, 165th Annual Meeting, American Psychiatric Association, Philadelphia, Pa. Contact: APA Annual Meetings Dept., 1000 Wilson Blvd., Ste. 1825, Arlington, VA 22209; (703) 907-7815.

---

## JUNE

**June 23–27**, Joint Organizational Meeting of the Organization of Teratology Information Specialists, the Teratology Society, and the Neurobehavioral Teratology Society, Baltimore, Md. Contact Ms. Dee Quinn, University of Arizona, Drachman Hall, PO Box 210202, 1295 N. Martin, Room B308, Tucson, AZ 85721-0202; (520) 626-3547 (tel); [www.otispregnancy.org](http://www.otispregnancy.org); [www.teratology.org](http://www.teratology.org); [www.nbts.org](http://www.nbts.org).

---

## OCTOBER

**October 3–5**, International Biennial Congress of the Marcé Society (Inter-

national Society for the Understanding, Prevention and Treatment of Mental Illness Related to Childbearing), in collaboration with the Société Marcé Francophone, Paris, France (conducted in English). Contact: Ms. Nicole Greer, 5034-A Thoroughbred Lane, Brentwood, TN 37027 USA; (615) 324-2362 (tel); [info@marcesociety.com](mailto:info@marcesociety.com) (email); [www.marcesociety.com](http://www.marcesociety.com) (web site).

**October 4–7**, 64th Institute on Psychiatric Services, American Psychiatric Association, New York, NY. Contact: Jill Gruber, APA Annual Meetings Dept., 1000 Wilson Blvd., Ste. 1825, Arlington, VA 22209; (703) 907-7815.

---

## JUNE 2013

**June 6–9**, 4th World Congress on ADHD: From Childhood to Adult Disease, Milan, Italy. Contact Congress Organizer, +49-40-670 88 20 (tel); [adhd2013@cpo-hanser.de](mailto:adhd2013@cpo-hanser.de) (email); [www.adhd-congress.org](http://www.adhd-congress.org) (web site)

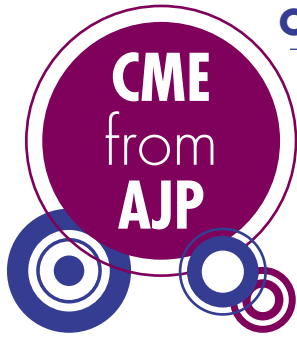

## Continuing Medical Education

Three articles in this issue form the basis of a short course with questions that can be answered for up to 1 *AMA PRA Category 1 Credit™* each by visiting <http://cme.psychiatryonline.org/> and clicking on “American Journal of Psychiatry CME.”

CME credit is issued only online, and a paid subscription to the AJP CME course program is required.

This month's courses appear on pages 105–108.

FREE AUDIO!

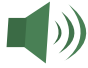

## Have You Heard?

You can listen to highlights of *The American Journal of Psychiatry* by downloading a monthly free .mp3 audio file from our web site (<http://ajp.psychiatryonline.org/audio.aspx#>) or by subscribing to the AJP Audio podcast at iTunes or other feed reader. Presented by Deputy Editor Dr. Susan Schultz or by Executive Editor Michael Roy, each month's audio lasts approximately 30 minutes and covers several research articles, the Treatment in Psychiatry feature, and one or two editorials.

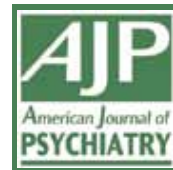

Coming in the February 2012 issue\*

## THE AMERICAN JOURNAL OF PSYCHIATRY

**Persistent Pulmonary Hypertension of the Newborn and Selective Serotonin Reuptake Inhibitors:  
Lessons From Clinical and Translational Studies**

M. Occhiogrosso, S.S. Omran, and M. Altemus

**Childhood Maltreatment Predicts Unfavorable Course of Illness and Treatment Outcome  
in Depression: A Meta-Analysis**

V. Nanni, R. Uher, and A. Danese

**Stimulant Medication Use in Children: A 12-Year Perspective**

S.H. Zuvekas and B. Vitiello

**Blood Pressure and Heart Rate Over 10 Years in the Multimodal Treatment Study  
of Children With ADHD**

B. Vitiello, G.R. Elliott, J.M. Swanson, L.E. Arnold, L. Hechtman, H. Abikoff, B.S.G. Molina, K. Wells, T. Wigal, P.S. Jensen, L.L. Greenhill, J.R. Kaltman, J.B. Severe, C. Odbert, K. Hur, and R. Gibbons

\*Can't wait? Visit [ajp.psychiatryonline.org/AJPInAdvance.aspx](http://ajp.psychiatryonline.org/AJPInAdvance.aspx) to see all articles uploaded in advance of print!

## Contents

- A1 Editorial Board
- A3 Highlights of this issue

### Editorials

- 1 **The bicentennial volume of the *British Journal of Psychiatry*: the winding pathway of mental science**  
P. Tyrer and N. Craddock
- 5 **Bipolar depression and treatment with antidepressants**  
G. M. Goodwin
- 7 **Nocturnal enuresis with antipsychotic medication**  
T. B. E. Barnes, M. J. Drake, and C. Paton

- 9 **Section – poems by doctors**  
Nitesh Painuly

### Reappraisal

- 10 **Transcranial stimulation in depression**  
C. Allan, U.-G. Kaku, C. E. Sexton and K. P. Ebmeier

### Special article

- 12 **To meta-analyse or not to meta-analyse: abortion, birth and mental health**  
T. Kendall, V. Bird, R. Cantwell and C. Taylor

- 14 **Thomas Chetcuti – an image in Maltese psychiatry – psychiatry in pictures**  
Anne-Marie Scerri

### Review article

- 15 **Efficacy, cost-effectiveness and acceptability of self-help interventions for anxiety disorders: systematic review**  
C. Lewis, J. Pearce and J. I. Blisson

### Papers

- 22 **Preventing progression to first-episode psychosis in early initial prodromal states**  
A. Bechdörf, M. Wagner, S. Ruhrmann, S. Harrigan, V. Putzfeld, R. Pukrop, A. Brockhaus-Dumke, J. Berrig, B. Janssen, P. Decker, R. Bottlender, K. Maurer, H. J. Möller, W. Gaebel, H. Häfner, W. Maier and J. Klosterkötter
- 30 **Regional specificity of thalamic volume deficits in male adolescents with early-onset psychosis**  
J. Janssen, Y. Alemán-Gómez, S. Reig, H. G. Schnack, M. Parellada, M. Graell, C. Moreno, D. Moreno, I. M. Mateos-Pérez, J. M. Udias, C. Arango, M. Desco
- 37 **Features of subsyndromal and persistent delirium**  
D. Meagher, D. Adams, P. Trzepacz and M. Leonard
- 45 **Association between antidepressant resistance in unipolar depression and subsequent bipolar disorder: cohort study**  
C.-T. Li, Y.-M. Bai, Y.-L. Huang, Y.-S. Chen, T.-J. Chen, J.-Y. Cheng and T.-P. Su

- 52 **Transcranial direct current stimulation for depression: 3-week, randomised, sham-controlled trial**  
C. K. Loo, A. Alonzo, D. Martin, P. B. Mitchell, V. Galvez and P. Sachdev

- 59 **The butterfly – extra**  
Shabbir Amanullah

- 60 **Brief psychodynamic interpersonal psychotherapy for patients with multisomatoform disorder: randomised controlled trial**  
H. Sattel, C. Lahmann, G. Gündel, E. Gultfried, J. Kruse, M. Noll-Hussong, C. Ohmann, J. Ronel, M. Sack, N. Sauer, G. Schneider and P. Henningsen

- 67 **DSM – in 100 words**  
Peter Tyrer

- 68 **Methylphenidate treatment of adult male prison inmates with attention-deficit hyperactivity disorder: randomised double-blind placebo-controlled trial with open-label extension**  
Y. Ginsberg and N. Lindfors

### Columns

- 74 **Correspondence**
- 84 **Book reviews**
- 86 **Contents of *Advances in Psychiatric Treatment***
- 87 **Contents of the *American Journal of Psychiatry***
- 88 **From the Editor's desk**

### Cover picture

*The Fairy Feller's Master-Stroke*  
(c.1855–1864), detail  
Richard Dadd (1817–1886)

When Richard Dadd was transferred from Bethlem Hospital to the newly opened Broadmoor in 1864, he had to leave behind his not-quite-finished masterpiece, *The Fairy Feller's Master-Stroke*. At Broadmoor he was soon at work at a watercolour version of the picture and by January 1865 had completed a rhymed description of its complex contents which he titled *Elimination of a Picture*. Here he identifies, among many other characters, the miniscule figures placed along the bizarrely elongated brim of the hat worn by the bearded 'Patriarch' at the centre of the painting. On the left Mab, Queen of the Fairies and originator of wish-fulfilling dreams (according to Mercutio in *Romeo and Juliet*), is parked in her chariot along with its team of female centaurs – creatures perhaps inspired by King Lear's description of his treacherous daughters. To the right, a troupe of Spanish dancers process jauntily. Among them, Dadd tells us, is one dressed like Pauline Duvernay, whose *cachucha* he must have remembered from the London stage.

The picture is a detail of Richard Dadd's *The Fairy Feller's Master-Stroke* c.1855–1864. Taken from *Richard Dadd: The Artist and the Asylum*, Tate Publishing 2011.

Text by Nicholas Tromans, who teaches at Kingston University London and is the author of *Richard Dadd: The Artist and the Asylum*, a review of which will be published in a subsequent issue of the *Journal*.

We are always looking for interesting and visually appealing images for the cover of the *Journal* and would welcome suggestions or pictures, which should be sent to Dr Allan Beveridge, British Journal of Psychiatry, 17 Belgrave Square, London SW1X 8PG, UK or [bjp@rpspsych.ac.uk](mailto:bjp@rpspsych.ac.uk).

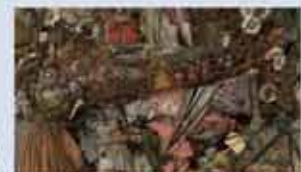

Source: https://psychiatryonline.org/doi/suppl/10.1176/ajp.2012.169.issue-1/suppl_file/front.pdf
